# Supplementary material for: Experiences of stigma and discrimination of people with schizophrenia in India
Source: PubMed Central journal article supplement (PMC4259492; doi:10.1016/j.socscimed.2014.10.035), 2014-12

**Online figure 2: Alienation item percentages**

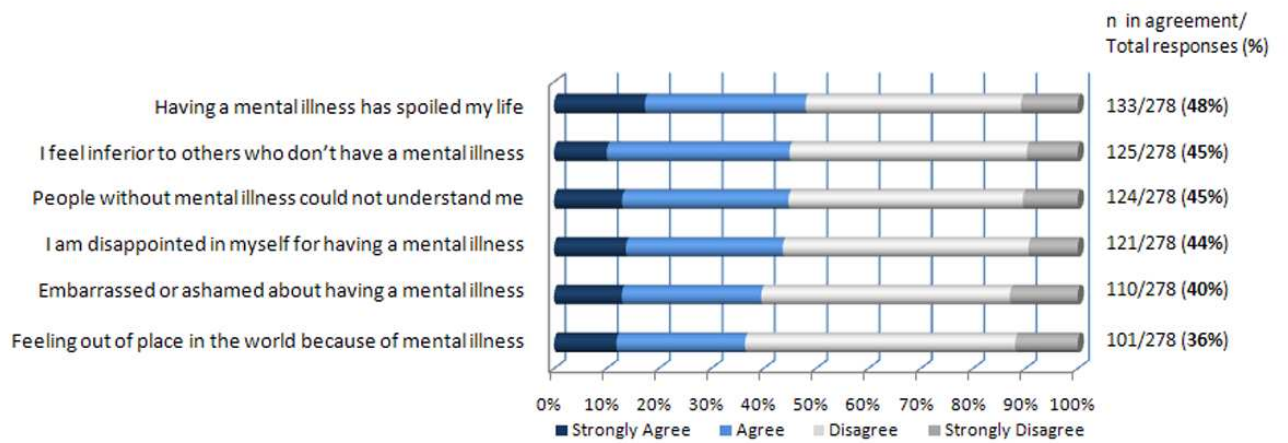

Supplement: mmc4.pdf [file mmc4.pdf]
